# Supplementary material
Source: PubMed Central journal article supplement (PMC6754265)
Supplement: NIHMS1045542-supplement-1.pdf [file NIHMS1045542-supplement-1.pdf]

# ESM Fig. 1

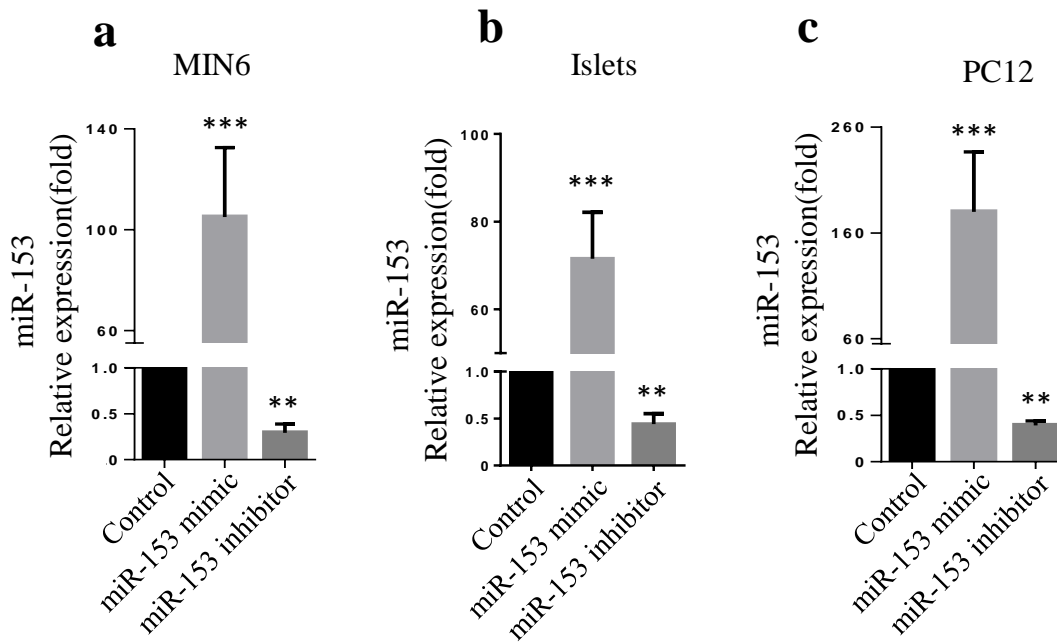

**ESM Fig. 1.** The relative miR-153 levels in MIN6 cells (a), mouse islets (b) and PC12 cells (c) transfected with a miR-153 mimic or inhibitor or scramble control for 72 hours. Data bars (mean  $\pm$  standard error) represent the average of 3 independent experiments in triplicate. \*\* $p < 0.01$  and \*\*\* $p < 0.001$  vs controls
