# Supplementary material
Source: PubMed Central journal article supplement (PMC6754265)
Supplement: NIHMS1045542-supplement-2.pdf [file NIHMS1045542-supplement-2.pdf]

**ESM Table 1: primers used in the experiment.**

| <b>Primer name</b>           | <b>Forward primer (5'-3')</b>           | <b>Reverse primer (5'-3')</b>   |
|------------------------------|-----------------------------------------|---------------------------------|
| <i>miR-153</i>               | Mm_miR-153_1 (Qiagen, cat: MS00011214 ) | Univerasl primer (Qiagen)       |
| <i>Cacna1c</i>               | CTCCAACGCCACCAACTC                      | AAAGCCCTACAACCACGATT            |
| <i>Cask</i>                  | CTACATGAGACAGATACTGGAA                  | CCAAGTTTAAACAGGTGCCGAGT         |
| <i>Camk2g</i>                | TCGCCAAGAGACGGTAGAGT                    | TTGGCAGCTGAAAAGTTCCT            |
| <i>Cacnb4</i>                | GCAAGAGTAGGAACCGCTTG                    | GCAGCCTCAAAGCCTATGTC            |
| <i>Cib2</i>                  | CCCGATGGACTACAGGAAGA                    | CTGATTCGCAGAGCACAGAG            |
| <i>WT-Cacna1c</i>            | GCTactagtAGGGGAGGAATAAGAGCGGT           | CCGagcttAGTCATTGTATTTGCTTGGCACA |
| <i>Mut-Cacna1c</i>           | TCCCACGAGATAgagtAAAGCAATGCAAT           | ATTGCATTGCTTTactcTATCTCGTGGGA   |
| <i>IA2<math>\beta</math></i> | TCAGTTGCTGGAGCCATACA                    | TCCTTGTACTGGGTCATCC             |
| <i>GAPDH</i>                 | GTCGGTGTGAACGGATTTG                     | GAATTTGCCGTGAGTGGAG             |
